# Supplementary material
Source: HighWire-hosted journal article supplement (https://jnm.snmjournals.org/highwire/filestream/104721/field_highwire_adjunct_files/0/262471_Supplemental_Data.pdf)
Supplement: 262471_Supplemental_Data.pdf [file 262471_Supplemental_Data.pdf]

|                                                                                   | Total population<br>(n=84) | “high“ specific activity<br>group (n=42) | “low” specific activity<br>group (n=42) | <i>P</i> value *  |
|-----------------------------------------------------------------------------------|----------------------------|------------------------------------------|-----------------------------------------|-------------------|
| Median (interquartile range) age in years                                         | 71.5 (64–77.5)             | 69.5 (63–77)                             | 72 (65–78)                              | <i>P</i> = 0.3183 |
| Median (interquartile range) ISUP grade                                           | 3 (2–5)                    | 3 (2–4)                                  | 3 (2–5)                                 | <i>P</i> = 0.3540 |
| Median (interquartile range) PSA at<br>timepoint of scan (ng/mL)                  | 2.67 (0.55–11.42)          | 2.40 (0.55–9.13)                         | 3.99 (0.53–14.80)                       | <i>P</i> = 0.2138 |
| ADT in the 6 months prior to PET/CT                                               | 35/84 (41.7%)              | 19/42 (45.2%)                            | 16/42 (38.1%)                           | <i>P</i> = 0.6580 |
| Indication for PET/CT                                                             |                            |                                          |                                         | <i>P</i> = 0.4227 |
| Primary staging                                                                   | 18 (21.4%)                 | 9 (21.4%)                                | 9 (21.4%)                               |                   |
| Restaging of biochemical recurrence                                               | 45 (53.6%)                 | 20 (47.6%)                               | 25 (59.5%)                              |                   |
| Metastasized prostate cancer                                                      | 21 (25.0%)                 | 13 (31.0%)                               | 8 (19.0%)                               |                   |
| Median (interquartile range) injected<br>activity per bodyweight (MBq/kg)         | 4.0 (3.9–4.0)              | 4.0 (3.9–4.0)                            | 4.0 (3.9–4.0)                           | <i>P</i> = 0.6176 |
| Median (interquartile range) <sup>18</sup> F-rhPSMA-<br>7.3 uptake time (minutes) | 71 (66–79)                 | 70 (65–76)                               | 75 (68–87)                              | <i>P</i> = 0.0602 |
| Median (interquartile range) specific<br>activity (MBq/μg)                        | 81.4 (19.3–178.9)          | 178.9 (158.6–199.1)                      | 19.3 (17.7–22.5)                        | <i>P</i> < 0.0001 |

**Supplemental Table 1** Patient characteristics stratified by “high” vs. “low” specific activity group. Clinical and PET parameters were matched for both groups. median specific activity at time point of injection was different by a factor of 10 (*P*<0.0001).

ADT. androgen deprivation therapy; ISUP. International Society of Urological Pathology; PET/CT. positron emission tomography/computed tomography; PSA. prostate specific antigen. \* *Mann-Whitney U test*

|                                                                               | Patients injected with   |                         |
|-------------------------------------------------------------------------------|--------------------------|-------------------------|
|                                                                               | "high" specific activity | "low" specific activity |
| <b>Specific activity at calibration</b><br>[MBq/μg]<br>median (IQR)           | 281.3 (247.1-346.6)      | 197.8 (181.6-237.8)     |
| <b>Time between calibration and injection [min]</b><br>median (IQR)           | 72 (54-89)               | 367 (342-397)           |
| <b>Specific activity at injection</b><br>[MBq/μg]<br>median (IQR)             | 178.9 (158.6–199.1)      | 19.3 (17.7–22.5)        |
| <b>Proportion of <sup>18</sup>F-labelled rhPSMA-7.3 [%] *</b><br>median (IQR) | 0.69 (0.60-0.84)         | 0.48 (0.44-0.58)        |
| <b>injected mass [μg]</b><br>median (IQR)                                     | 1.75 (1.61-1.83)         | 17.43 (15.27-19.96)     |

**Supplemental Table 2** Data for specific activity at calibration, time between calibration and patient injection, specific activity at injection and injected mass for the “high” and “low” specific activity group.

| <b>Organ</b>                | <b>“high“ specific activity<br/>Median SUV<sub>mean</sub> (interquartile range)</b> | <b>“low” specific activity<br/>Median SUV<sub>mean</sub> (interquartile range)</b> | <b><i>P</i></b>  |
|-----------------------------|-------------------------------------------------------------------------------------|------------------------------------------------------------------------------------|------------------|
| <b>Parotid glands</b>       | 19.2 (17.2–22.4)                                                                    | 16.7 (14.4–20.5)                                                                   | <i>P</i> =0.0142 |
| <b>Submandibular glands</b> | 22.3 (18.0–26.7)                                                                    | 18.1 (15.2–20.6)                                                                   | <i>P</i> =0.0017 |
| <b>Bloodpool</b>            | 2.0 (1.8–2.3)                                                                       | 2.2 (1.9–2.4)                                                                      | <i>P</i> =0.1591 |
| <b>Liver</b>                | 7.2 (6.1–8.7)                                                                       | 7.1 (6.2–8.2)                                                                      | <i>P</i> =0.9929 |
| <b>Spleen</b>               | 9.6 (7.7–12.2)                                                                      | 7.8 (5.7–10.0)                                                                     | <i>P</i> =0.0115 |
| <b>Kidneys</b>              | 34.5 (28.1–41.3)                                                                    | 34.2 (28.1–39.7)                                                                   | <i>P</i> =0.8650 |
| <b>Bone</b>                 | 1.4 (1.1–1.6)                                                                       | 1.5 (1.1–1.8)                                                                      | <i>P</i> =0.2128 |
| <b>Muscle</b>               | 0.8 (0.7–0.8)                                                                       | 0.8 (0.7–0.9)                                                                      | <i>P</i> =0.7051 |
| <b>Tumor</b>                | 9.0 (4.4–14.8)                                                                      | 9.5 (6.5–19.0)                                                                     | <i>P</i> =0.2734 |

**Supplemental Table 3** <sup>18</sup>F-rhPSMA-7.3 SUV<sub>mean</sub> stratified by <sup>18</sup>F-rhPSMA-7.3 specific activity (volume of interest analysis)

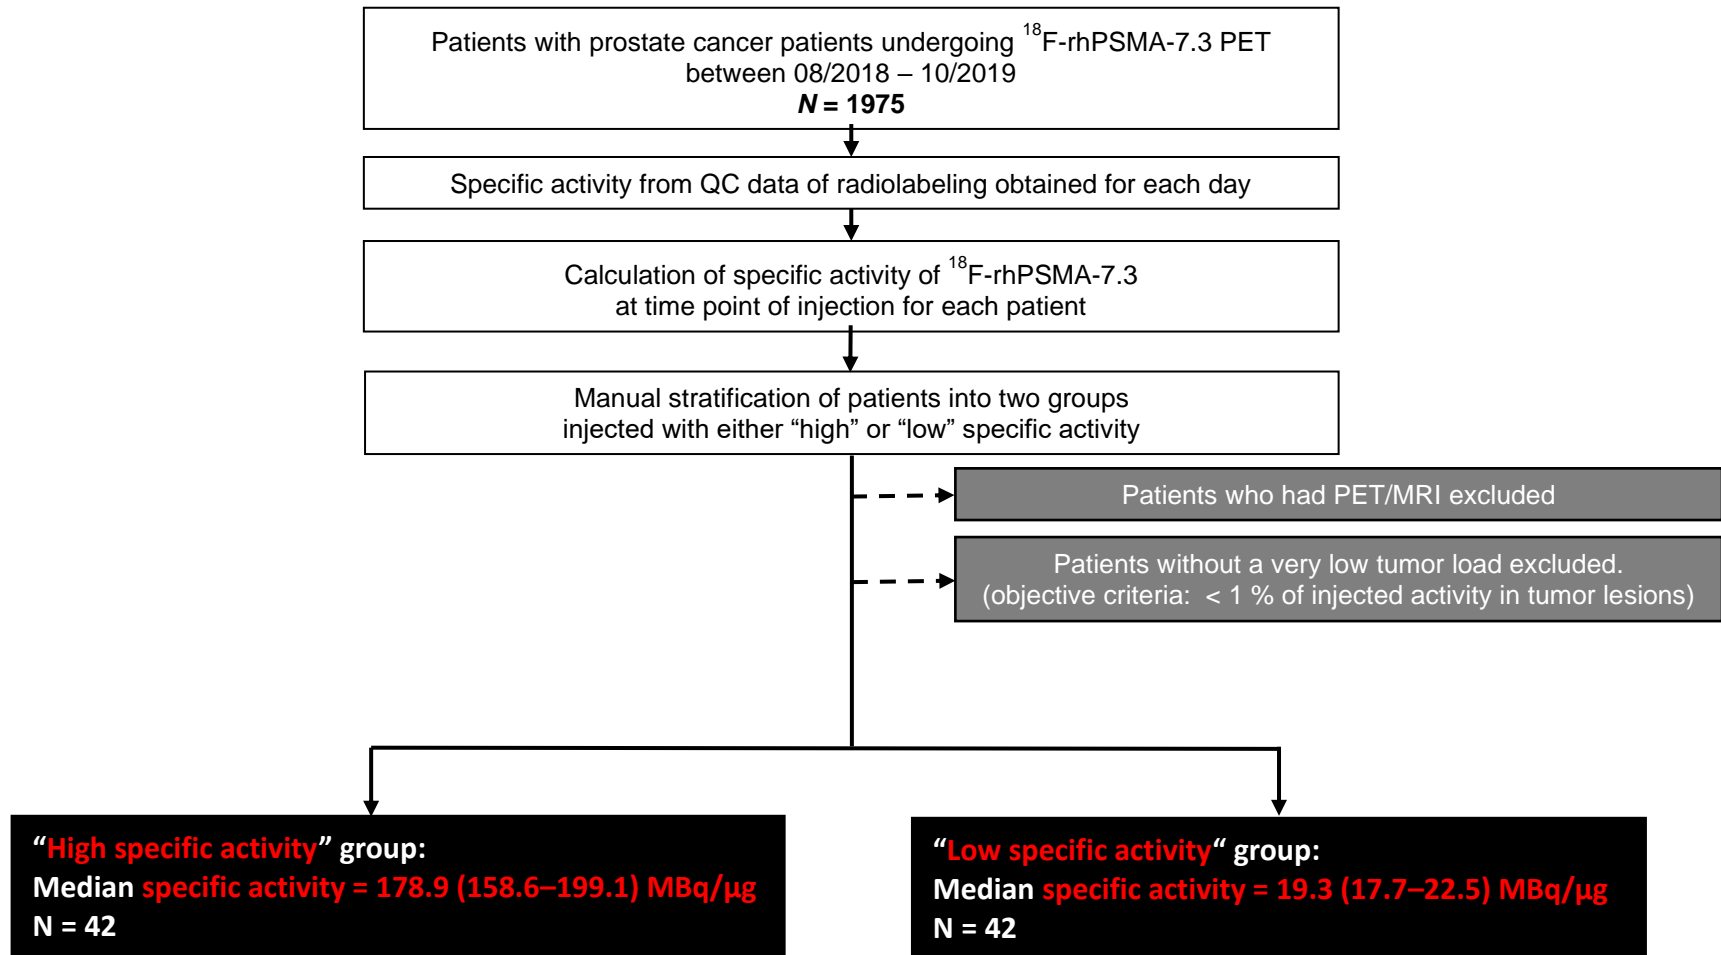

**Supplemental Figure 1** Study flow chart

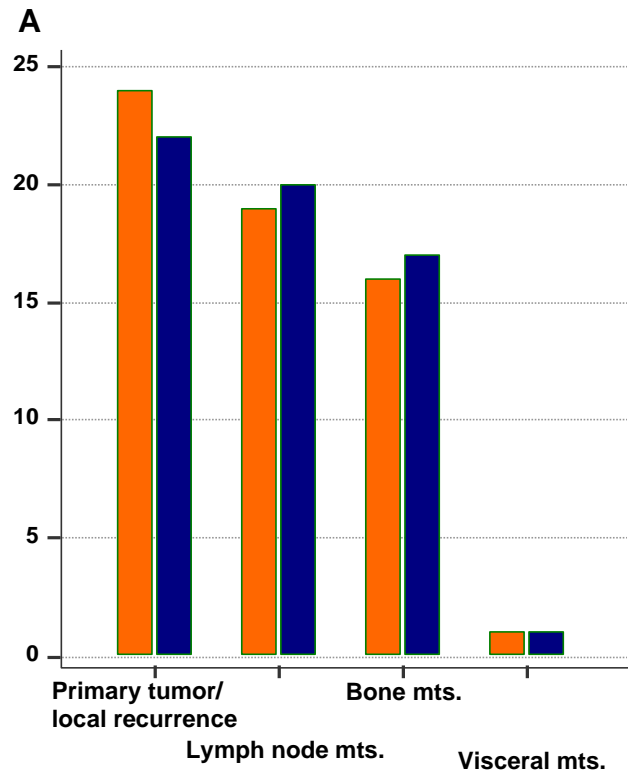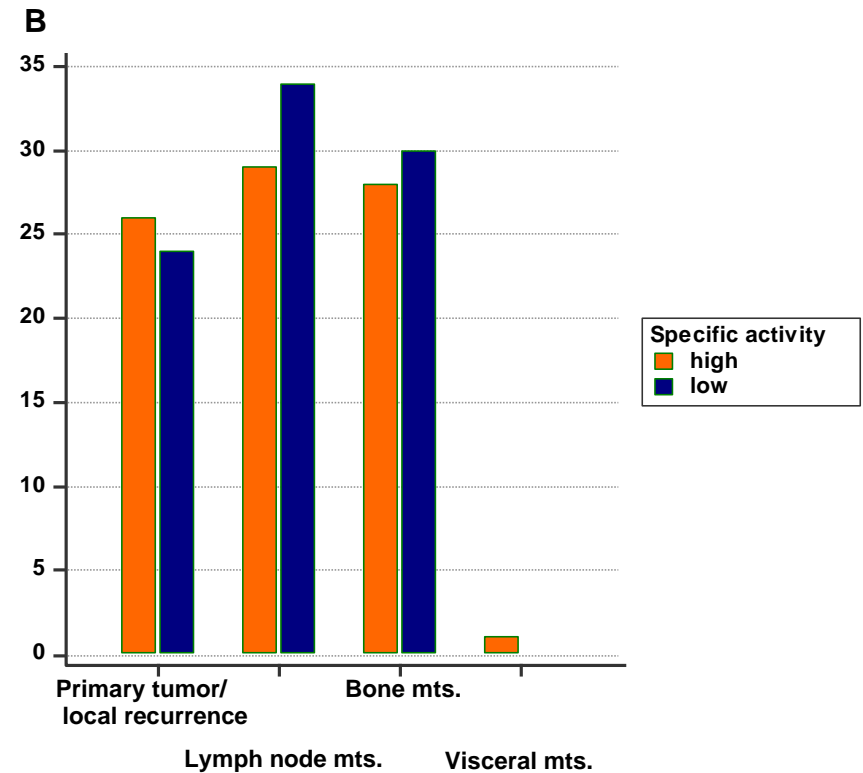

**Supplemental Figure 2** Number and localization of the analyzed tumor lesion compared for both groups. No statistical difference of the lesion distribution was present between the “high” and “low” specific activity group. A: type and number of tumor sites involved in the patient cohorts  
 B: types and number of tumor lesions included in the quantitative SUV-based analysis. Mts. = metastases.
